# Supplementary material for: Chromatin-mediated translational control is essential for neural cell fate specification
Source: Life Sci Alliance. 2018 Aug 23;1(4):e201700016. doi: 10.26508/lsa.201700016 (PMC6238594; doi:10.26508/lsa.201700016)
Supplement: Supplementary file 1 [file LSA-2017-00016_TableS1.xlsx]

## Sheet: Sheet1
Supplementary Table 1. List of differentially expressed genes in Chd5-/- NSCs
Gene name	WT_rep1	WT_rep2	Chd5-/-_rep1	Chd5-/-_rep2	log2FoldChange	p-value	adjusted_p-value
	(TPM)	(TPM)	(TPM)	(TPM)	[Chd5-/-]/[WT]
AK216824	115.37	168.65	0.01	0.46	-5.11713	1.9656e-24	1.57563e-20
Six3os1	98.63	90.13	0.61	1.61	-4.17974	3.67022e-18	5.88409e-15
Six3	38.13	37.64	0.54	0.7	-3.06659	1.25507e-08	4.57301e-06
Fam84a	188.71	231.31	25.66	19.6	-2.89832	1.14336e-18	2.2913e-15
AK193034	51.33	79.46	10.5	6.01	-2.41148	1.07414e-07	2.32712e-05
Nudt7	23.2	44.22	2.7	2.91	-2.27413	2.12217e-05	0.00158287
Emx2	29.59	12.11	2.3	0.2	-2.01836	0.000444265	0.0162401
Grm3	28.53	23.1	0.71	5.18	-1.92777	0.000459963	0.0166084
Lppr5	35.43	47.72	6.03	9.17	-1.89518	7.82983e-05	0.00450623
Cd93	108.44	38.62	20.05	11.16	-1.74032	0.000269644	0.0115435
Slc35f1	73.39	99.93	24.48	26.22	-1.58013	1.91828e-05	0.0014994
Gcnt4	53.36	25.76	7.02	12.22	-1.53467	0.00202847	0.0469182
Cdh19	64.35	74.62	6.13	29.21	-1.5309	0.00151988	0.038073
F3	160.76	215.72	47.09	74.78	-1.4801	7.46797e-06	0.000748291
Cd36	121.22	266.61	82.61	33.35	-1.44563	0.000821791	0.0248584
Trim9	148.99	106.15	31.31	51.97	-1.44211	5.88368e-05	0.00351967
Mtmr11	66.17	36.32	17.53	13.1	-1.38952	0.00206429	0.0471118
AK202494	300.53	406.27	137.41	125.93	-1.3385	1.39327e-06	0.000201184
Kitl	78.13	150.84	52.17	25.64	-1.31637	0.00146607	0.0370725
Prrx1	58.95	92.48	29.15	24.18	-1.3118	0.000731204	0.0226306
Gm7120	109.24	84.16	30.26	41.14	-1.2912	0.000249874	0.0108785
Fut8	394.53	570.18	208.67	166.65	-1.26602	1.44968e-05	0.00121049
Rgs20	254.63	286.11	91.41	122.26	-1.25995	6.81497e-06	0.000708565
Tlr3	73.88	64.5	32.17	18.85	-1.24435	0.0014567	0.0370725
Tmem229a	720.58	788.67	189.55	390.72	-1.24192	0.000302261	0.0123619
Chst2	64.45	56.57	24.09	20.79	-1.24143	0.00131587	0.0352777
AK163440	15043	25906	8649.91	7864.29	-1.23289	5.61604e-06	0.000633501
Lyn	109.49	114.29	49.23	39.23	-1.22721	0.000133095	0.00671001
Slc1a3	1871.05	1620.4	442.25	1005.58	-1.1256	0.00206878	0.0471118
AK207899	1088.82	1167.08	571.94	444.23	-1.09126	1.93804e-05	0.0014994
Hrsp12	202.03	230.24	83.09	111.22	-1.07862	0.000164413	0.0080362
Chst11	159.34	154.22	80.42	61.08	-1.06937	0.000286387	0.0119567
AK142750	18229.1	24756.5	9387.42	10902.8	-1.04199	2.2243e-06	0.000278593
Ermp1	204.73	229.06	116.9	87.35	-1.01789	0.000352639	0.013646
Uchl3	135.95	153.95	66.72	70.09	-1.00859	0.000493117	0.0172613
X57780	16120.9	20873.3	8374.08	9809.64	-0.987285	4.87431e-06	0.000574596
BC069931	41732.4	47646.1	17240.8	27237.8	-0.966318	1.98274e-05	0.0014994
AK131579	41732.4	47646.1	17240.8	27237.8	-0.966318	1.98274e-05	0.0014994
Crot	323.63	310.54	161.7	152.81	-0.962346	0.000101523	0.00531903
Eif3j1	247.16	261.79	143.86	105.71	-0.96202	0.000542721	0.0183563
AK191723	1508.15	2119.05	1069.74	723.66	-0.938018	0.00218735	0.0489771
Sept7	839.31	968.74	470.61	444.85	-0.936244	9.89031e-05	0.00525822
Fmnl2	276.32	262.89	138.38	139.56	-0.907164	0.000315946	0.012791
Spry2	359.77	350.01	208.4	163.77	-0.88265	0.000664342	0.0211324
Mpc1	628.32	625.9	343.93	344.11	-0.82937	0.000354087	0.013646
Tm9sf2	245	273.9	131.91	156.43	-0.802984	0.00223206	0.0495629
AK131586	54366.7	55773.8	34446.4	29100.7	-0.781177	4.03536e-08	1.04347e-05
Capza2	557.16	603.38	326.43	334.77	-0.775921	0.000996279	0.0285221
Cldnd1	371.89	365.29	206.52	214.5	-0.771051	0.00133535	0.035438
AK018753	7311.47	9151.92	5170.25	4317.21	-0.760493	0.00124425	0.0338439
DQ539915	57843.5	60955.7	42532.2	37629	-0.560445	1.25214e-05	0.00107927
Cd81	554.61	697.14	1048.77	1158.87	0.777022	0.00212033	0.0480129
Ppib	207.48	205.74	338.74	394.06	0.787189	0.00154362	0.0384276
Rpl24	639.8	470.7	994.02	1028.42	0.816091	0.00196486	0.0459556
Gstm5	192.56	177.07	326.18	351.58	0.83156	0.000765175	0.0235006
Rpl35a	1056.34	699.66	1707.7	1652.02	0.875386	0.002057	0.0471112
Pbxip1	99.16	96.9	202.53	171.5	0.87946	0.00136164	0.035438
Prdx2	290.96	213.61	416.98	554.97	0.881685	0.00216717	0.0486611
Rpl11	687.82	442.09	1038.03	1180.8	0.905771	0.00202423	0.0469182
Aplp2	316.02	345.14	561.12	728.97	0.912426	0.000468706	0.0166984
Rps3	303.44	219.43	490.73	553.14	0.94062	0.000554342	0.0185264
Wls	162.93	244.2	422.06	396.11	0.941258	0.000951669	0.02754
Ndufs5	97.63	85.82	207.78	164.92	0.952065	0.000882881	0.026115
Rab1b	71.66	53.38	124.18	132.75	0.958456	0.00194803	0.0458114
Rps2	440.32	333.58	715.06	854.41	0.960782	0.000344518	0.0134715
Actg1	714.65	752.33	1807.71	1192.9	0.96432	0.000760151	0.0234361
Rpl6	462.45	281.75	734.22	797.24	0.964473	0.00135329	0.035438
Sqstm1	144.49	135.98	315.41	254.3	0.965374	0.000279776	0.0118661
Uqcrc1	85.35	63.67	177.48	131.88	0.967772	0.00199519	0.0464925
Rps11	938.71	554.14	1409.78	1695.84	0.971774	0.00194335	0.0458114
Lgmn	48.96	64.66	123.59	114.05	0.976178	0.00186459	0.0443517
Park7	53.26	43.99	100.78	103.21	0.982515	0.00208796	0.0474137
Tmsb4x	3111.81	2363.59	5164.2	6067.1	0.983783	9.99042e-05	0.00526863
Rps29	317.33	225.94	514.52	609.86	0.985534	0.000399676	0.0148324
Rpl13a	422.45	288.05	738.74	738.47	0.991289	0.000361134	0.013851
Scpep1	89	80.63	196.79	159.47	0.996061	0.000492996	0.0172613
Eef1g	340.57	222.13	601.73	579.59	0.998764	0.00050973	0.0176491
Lrrc42	57.25	66.03	134.16	126.57	1.00733	0.000710986	0.0221761
Rps17	947.62	630.86	1626.12	1709.88	1.00933	0.000370498	0.014092
Nisch	71.3	59.45	146.82	130.18	1.01257	0.000682497	0.021539
Rn45s	452.42	332.39	751.38	907.64	1.01596	0.000218323	0.00972263
Ddost	48.27	40.17	91.95	100.22	1.02565	0.00173094	0.0416674
Slc38a2	69.51	47.2	145.44	111.16	1.02585	0.00204344	0.0469347
Pebp1	256.33	194.83	467.74	492.8	1.03204	7.87017e-05	0.00450623
Tmem256	114.42	107.54	249.06	224.55	1.03424	8.13943e-05	0.00462735
Eif3f	174.87	101.74	279.85	325.01	1.03482	0.00105211	0.0296961
Rpl34	425.12	255	625.84	872.04	1.04137	0.00127441	0.0345125
Ubxn1	60.31	43.5	126.28	104.22	1.04436	0.0013613	0.035438
Tecr	116.12	78.75	194.52	231.62	1.04738	0.000503839	0.0175599
Plcd4	60.14	67.55	111.22	175.07	1.05429	0.00146036	0.0370725
Cox6a1	296.33	198.72	636.06	457.3	1.05568	0.000556608	0.0185264
Gabarapl1	115.25	75.23	222.95	196.54	1.05794	0.000510802	0.0176491
Ndufa7	69.82	47.72	132.66	130.19	1.06131	0.000788733	0.0241316
Rps12	685.85	444.9	1108.33	1409.25	1.06935	0.000375974	0.0141677
Lars2	888.71	538.6	1643.16	1543.01	1.07172	0.000392518	0.0146345
Ssr2	86.48	55.11	168.25	149.25	1.07221	0.000721713	0.0224234
Rplp1	205.44	153.73	360	432.65	1.07401	9.41878e-05	0.00513612
Psmb3	49.7	35.43	108.28	88.34	1.08546	0.00162599	0.0399814
U2af2	50.36	34.18	89.08	104.78	1.08678	0.00165138	0.0404815
Tmem258	135.91	81.12	210.81	287.96	1.09369	0.000888143	0.0261741
Calm3	54.1	39.36	94.82	120.96	1.10038	0.00110678	0.0310208
Rpl29	167.65	103.1	259.66	368.44	1.10671	0.000663927	0.0211324
AK198904	119.56	80.73	239.77	219.27	1.10681	0.000182047	0.00853385
Plcg1	62.29	48.63	110.04	147.09	1.10695	0.000608557	0.019911
Fgfr1	50.13	54.4	113.73	126.16	1.11364	0.000283604	0.0119567
Dctn2	47.95	32.56	81.87	110.72	1.11858	0.00166451	0.0405028
Lasp1	42.36	35.02	86.09	95.8	1.12358	0.000850194	0.0253352
Tmem106c	41.32	37.36	79.66	105.97	1.12959	0.00101558	0.0289711
Ctsf	38.31	34.41	75.07	97.69	1.13436	0.00118423	0.0327337
Uba52 (uc008zrg.2)	403.87	312.02	809.84	838.22	1.14006	8.50713e-06	0.000831624
Coa3	47.69	33.01	105.6	88.67	1.14016	0.000980942	0.0281836
Aes	55.37	58.9	132.59	134.26	1.14032	0.000118144	0.00607081
Psenen	80.69	57.34	153.18	173.52	1.14978	0.000167841	0.00805636
AK181631	83.59	75.68	156.89	221.63	1.1511	0.000144758	0.00725237
Idh2	57.06	51.08	149.15	109.92	1.15589	0.000295466	0.0121459
Bex4	47.53	36.35	98.09	105.01	1.15653	0.000491119	0.0172613
Drap1	37.41	30.83	98.63	69.31	1.15772	0.00146411	0.0370725
Rpsa	267.36	170.67	467.97	576.96	1.16266	0.000107387	0.0055897
Atp5j2	221	151.1	483.29	400.2	1.16326	5.55529e-05	0.00337685
Sort1	39.82	40.37	95.54	97.58	1.16559	0.000348166	0.013548
Rps16	409.92	243.73	709.52	866.63	1.1686	0.000181295	0.00853385
Clic1	50.86	43.86	124.64	104.52	1.16905	0.000242147	0.0106651
Ndufa3	184.42	117.47	338.21	382.59	1.16963	8.50577e-05	0.00476799
Mrps21	75.13	60.77	159	166.39	1.17158	5.20597e-05	0.00321008
Vps28	32.66	24.04	71.32	73.04	1.18186	0.00133194	0.035438
Ech1	84.26	51.9	180.75	154.3	1.18886	0.000228712	0.010129
Gstm1	533.07	438.07	1650.08	800.53	1.19734	0.000653549	0.0210396
Tubb4b	78.22	72.59	220.48	151.8	1.20046	9.30921e-05	0.00513612
Ubb	421.55	271.74	627.99	1123.93	1.2008	0.000549908	0.0185213
Ndufs8	27.63	20.05	62.69	62.39	1.20183	0.00185099	0.0441594
2410006H16Rik	90.24	46.1	184	162.69	1.21484	0.000462711	0.0166169
Idh3g	104.49	66.9	199.13	227.04	1.21527	7.66321e-05	0.00445132
Cyc1	86.85	67.4	217.68	164.78	1.21541	6.35505e-05	0.00377349
Mea1	25.81	17.98	57.32	60.2	1.21612	0.00215445	0.0485114
Rpl19	448.68	289.3	864.62	959.79	1.21647	3.00809e-05	0.00206093
AK189470	30.34	22.12	70.38	66.14	1.21806	0.00119606	0.032947
Ctsd	348.23	289.96	983.2	610.43	1.21937	6.74521e-05	0.00394668
Rpl10a	348.88	181.34	605.81	743.95	1.22174	0.000285012	0.0119567
Eno1	321.68	340.07	1166.53	545.89	1.22702	0.000525425	0.0179992
1500012F01Rik	38.15	21.77	63.84	96.95	1.22751	0.00196642	0.0459556
Rpl13	388.28	207.27	792.37	726.5	1.23236	0.000159554	0.00784655
Psrc1	36.45	23.85	100.26	62.01	1.23967	0.00159805	0.0395369
Gnai2	121.08	93.52	194.62	365.53	1.24472	0.00032365	0.0129719
Ddit4	45.76	30.88	77.79	128.48	1.2469	0.000915724	0.0267899
Nucb1	25.2	20.08	66.4	55.65	1.24807	0.00135957	0.035438
Maged1	278.7	290.73	1181.83	398.62	1.25624	0.00203921	0.0469347
Supt4a	39.62	29.36	81.26	103.09	1.26403	0.000370936	0.014092
Rin2	44.18	40.88	89.53	135.05	1.26438	0.00024419	0.0106963
Ngfrap1	49.65	54.76	126.64	144.19	1.26552	2.93192e-05	0.00202606
Phpt1	56.45	29.57	92.29	142.91	1.26735	0.000905953	0.0266012
Rpl32	733.72	427.89	1368.87	1662.52	1.27025	5.86913e-05	0.00351967
Tmem50a	69.78	72.63	132	249.7	1.27088	0.000289763	0.0120349
Rps8	455.16	275.02	882.32	1011.76	1.27101	3.13727e-05	0.00207837
Txnip	123.79	120.08	286.97	334.78	1.2776	8.57557e-07	0.000129701
Carhsp1	81.58	71.56	144.75	268.24	1.28036	0.000215128	0.00963388
Eef1d	36.57	23.06	79.47	85.21	1.28102	0.000525102	0.0179992
Capns1	155.29	115.52	410.71	294.55	1.28237	1.59226e-05	0.00131583
St3gal6	19.01	30.17	86.8	53.46	1.28599	0.00176854	0.0424449
Ndufv1	35.77	23.98	97.15	68.99	1.28645	0.000678174	0.0214871
Prkcsh	26.3	21.88	66.03	66.9	1.2912	0.000590057	0.0193848
Slc35b2	32.27	17.18	69.16	70.48	1.29468	0.00113674	0.0316393
Churc1	66.46	66.81	276.16	103.81	1.29634	0.00134039	0.035438
Ctsa	31.03	23.66	80.71	70.6	1.29865	0.000387006	0.0144964
Tmed3	60.39	58.19	200.77	119.04	1.30065	0.000128074	0.00649772
Rpl26	777.82	466.01	1562.07	1779.32	1.31556	1.85357e-05	0.00148582
Anapc13	35.86	24.48	73.78	95.38	1.31792	0.000376462	0.0141677
Rps28	465.3	300.33	856.96	1210.56	1.31897	2.63488e-05	0.00185274
Cald1	90.77	157.11	448.22	248.22	1.32217	0.000270731	0.0115435
Plekha2	47.26	57.17	143.95	137.12	1.32677	1.16708e-05	0.00103948
Dpysl3	23.58	14.43	52.6	59.75	1.32832	0.00139169	0.0358706
Slc48a1	36.01	24.56	96.14	76.91	1.33358	0.000251063	0.0108785
H1f0	62.63	48.65	118.03	195.97	1.33816	0.000108116	0.00559132
Scrg1	92.16	52.61	147.3	269.14	1.33858	0.00033993	0.0134469
Klc1	19.75	12.34	48.28	49.66	1.34118	0.00182658	0.0437072
Bsg	245	276.32	1160.24	392.73	1.34415	0.000979779	0.0281836
Tcn2	31.91	26.23	86.08	78.9	1.34696	0.000149523	0.00744457
Anapc2	19.47	13.14	43.54	54.68	1.35608	0.00155319	0.0385459
Lgals1	109.6	176.82	567.38	270.42	1.35684	0.000308033	0.012534
Rpl35	204.77	146.35	431.44	537.72	1.36876	1.6286e-06	0.000217581
Fabp5	435.64	416.31	1381.69	959.59	1.36886	7.90801e-07	0.000129036
Igfbp2	66.71	81.08	261.46	158.65	1.36929	3.24807e-05	0.00211679
Lpin1	20.33	18.2	56.13	59.34	1.37503	0.000538773	0.0183
Ckb	377.68	311.74	807.13	1112.59	1.38431	6.82757e-07	0.000116446
Gpx4	75.98	55.26	214.66	157.94	1.38525	1.20147e-05	0.00105835
Cox4i1	227.69	158.59	462.17	628.16	1.38608	3.34191e-06	0.000405891
Atp5g2	157.41	95.05	277.83	457.67	1.39185	5.56068e-05	0.00337685
Trf	72.17	54.14	223.39	143.33	1.39667	2.71719e-05	0.001894
Bloc1s1	29.42	18.03	54.11	94.46	1.39669	0.00080219	0.0243574
Slc39a7	47.23	29.37	146.44	84.94	1.39895	0.000267282	0.011519
Prelid1	55.8	36.06	149.37	119.57	1.40167	3.09614e-05	0.00206822
Snora64	49.75	34.69	193.62	76.3	1.40282	0.000840915	0.0252463
Clu	39.95	58.97	244.5	78.6	1.40427	0.00137278	0.0356124
Phgdh	23.96	14.14	44.66	80.16	1.41507	0.00120908	0.0331918
Wnt5a	55.41	61.8	259.54	105.8	1.41901	0.000342352	0.0134524
Fads2	108.81	57.33	153.71	378.19	1.42073	0.000634911	0.0206888
Rplp0	227.1	142.18	441.14	652.91	1.43166	1.02465e-05	0.000955065
Lonp1	17.31	11.96	62.07	36.66	1.43542	0.00139792	0.0359157
Ndufa2	36.34	20.55	101.99	76.57	1.44302	0.000152888	0.00756512
Sh3bgrl3	12.54	10.36	40.29	40.23	1.44629	0.00145005	0.0370725
Psap	418.51	352.11	997.08	1227.16	1.44702	2.22187e-08	7.12421e-06
Pfdn5	114.49	65.22	256.55	283.37	1.45896	4.99844e-06	0.000578457
Phc2	10.95	8.26	31.63	38.25	1.45905	0.00222743	0.0495629
Ppfibp2	19.63	21.47	48.9	88.39	1.46853	0.000423215	0.0155619
Mxra8	53.26	73.61	193.37	187.96	1.47099	7.49837e-07	0.000125223
AK202495	145.1	66.54	305.75	360.37	1.47664	3.06218e-05	0.00206273
Tpi1	250.79	206.37	892.12	510.49	1.47808	4.7557e-06	0.00056898
Tmem9	14.77	9.74	33.98	57.31	1.48121	0.00136091	0.035438
Rplp2	139.18	96.14	326.74	382.97	1.48801	2.44704e-07	4.90387e-05
Gnb2l1	296.52	153.37	640.1	767.12	1.49022	9.19514e-06	0.000877479
Sepw1	127.44	101.36	304.63	382.83	1.4935	8.77357e-08	2.0094e-05
Bcas1	9.08	8.28	27.3	39.8	1.4973	0.00225613	0.049959
Rpl37	111.93	58.26	241.03	295.8	1.49843	1.09052e-05	0.00100479
H2-Ke6	16.25	9.47	50.63	39.67	1.50027	0.000941414	0.0274212
Pld3	13.89	10.09	38.64	48.12	1.50243	0.000844877	0.0252707
Slc25a39	28.43	17.17	60.74	92.12	1.50905	0.000189856	0.00879705
Mrpl23	20.81	13.78	61.05	58.76	1.51537	0.000192917	0.0088875
Pkm	202.86	196.17	845.33	432.82	1.51919	7.1446e-06	0.00072495
Ergic3	34.65	24.04	84.8	109.74	1.53128	2.38272e-05	0.00172071
Camkk2	15.06	19.56	113.99	29.52	1.53402	0.00194881	0.0458114
AK155692	1859.16	1117.29	4621.92	4749.81	1.53523	2.72928e-07	5.33608e-05
Ifitm3	10.91	8.33	35.57	37.64	1.53575	0.00111274	0.0310792
Tmsb10	188.77	60.84	474.07	399.78	1.5387	0.000165774	0.00805359
Qsox1	12.42	8.54	29.83	52.66	1.53876	0.0012455	0.0338439
Rps10	290.87	167.81	666.46	805.28	1.54228	1.07888e-06	0.000160153
Rpl18a	122.07	69.58	273.86	346.77	1.54563	1.9731e-06	0.000259285
Calcrl	27.16	38.72	112.22	104.73	1.54806	6.10174e-06	0.000652153
Thra	38.05	30.16	87.08	142.01	1.54946	2.44233e-05	0.0017424
Cope	8.19	6.51	33.61	28.84	1.55309	0.0016674	0.0405028
Grcc10	15.91	8.05	48.84	43.37	1.55446	0.000651786	0.0210396
Renbp	14.59	9.39	48.2	43.24	1.55639	0.000531301	0.018123
Ptms	93.64	71.83	258.77	266.48	1.55783	2.09479e-08	7.12421e-06
Slc29a1	9.98	5.64	39.39	28.62	1.5679	0.00148857	0.0375231
Vat1	12.04	10.04	55.73	31.59	1.57217	0.000798441	0.0243358
Pdk2	23.12	18	71.5	71.15	1.57469	3.55888e-05	0.00226413
Gaa	10.79	8.73	40.34	39.44	1.57514	0.000640426	0.020784
Arl2	7.55	5.14	36.53	22.89	1.57616	0.00221789	0.0495226
Mad2l2	13.33	10.95	26.07	78.64	1.59062	0.00138266	0.035753
Rpl37a	224.69	147.81	530.61	708.41	1.60146	1.37947e-07	2.90996e-05
Rps14	307.82	166.21	743.74	866.29	1.60873	8.31547e-07	0.000129701
Cxcr4	5.83	8.56	38.83	28.02	1.61104	0.00117202	0.0325082
Glmp	26.41	21.65	71.61	98.77	1.61132	1.64177e-05	0.0013429
Mapk3	30.22	20.58	80.38	100.94	1.61353	1.21838e-05	0.00106158
Slc22a17	28.59	20.33	62.49	123.29	1.62031	9.36386e-05	0.00513612
Msrb1	6.05	4.65	27.26	27.4	1.62566	0.00168336	0.0407669
Ddt	8.59	12.57	43.86	44.72	1.62932	0.000293219	0.0121157
Gap43	47.73	28.03	147.89	120.73	1.63586	2.78661e-06	0.000343654
Kcnn2	7.95	15.42	28.09	77.77	1.63818	0.00104059	0.0295793
Snrpd2	48.8	29.35	128.68	145.55	1.63947	1.61771e-06	0.000217581
Rpl7a	305.91	168.27	685.03	989.36	1.64391	1.40548e-06	0.000201184
Rabac1	6.56	3.34	26.1	27.21	1.64397	0.00190609	0.0452049
Ampd3	4.68	4.83	28.53	23.17	1.64676	0.00171448	0.0413953
Cx3cl1	15.76	23.78	162.18	30.69	1.64948	0.00123972	0.0338439
Slc38a3	28.22	23.87	79.56	109.49	1.65032	5.81023e-06	0.000633501
Plod1	10.34	6.64	41.81	32.83	1.65168	0.000565095	0.0186411
Spock2	7.6	6.72	33.66	33.61	1.65717	0.000662484	0.0211324
D8Ertd738e	24.58	14.66	74.27	77.45	1.65956	2.13261e-05	0.00158287
Rps5	195.59	110.47	467.17	621.07	1.66639	3.95952e-07	7.21353e-05
Sncaip	5.73	7.12	18.85	50.33	1.66748	0.00152676	0.0381261
Pfkl	7.52	8.85	44.26	31.59	1.66916	0.000479665	0.0170132
2310022B05Rik	11.13	12.27	25.93	84.28	1.67315	0.000833779	0.0251262
Mfge8	34.96	20.11	62.79	165.39	1.67381	0.000167042	0.00805636
Polr2f	10.84	5.61	31.56	46.37	1.6754	0.000559305	0.0185264
Grn	18.56	12.09	46.68	80.17	1.6756	0.000122482	0.00625362
Evi5l	21.79	14.92	41.53	119.39	1.67683	0.000322519	0.0129719
Myl6	150.4	105.37	526.11	372.67	1.67953	3.75588e-08	1.00357e-05
Serinc5	36.37	22.43	68.97	166.7	1.68115	9.48946e-05	0.0051397
Nenf	4.84	3.9	25.56	24.4	1.68197	0.00151802	0.038073
Wbp1	9.02	6.48	32.64	37.33	1.68433	0.000558331	0.0185264
Rpl36	7.8	2.46	23.51	33.59	1.6887	0.00166318	0.0405028
Rras	10.56	7.36	52.33	30.63	1.68988	0.000464344	0.0166169
Ndufa13	10.41	6.97	37.99	38.78	1.69639	0.000339732	0.0134469
Uqcr11	24.65	14.19	79.19	73.59	1.69999	1.68032e-05	0.00136055
Gnb4	4.53	6.49	50.35	16.21	1.70335	0.00161369	0.0398011
Bax	18.14	13.24	78.85	48.73	1.70378	6.58949e-05	0.00388392
Ube2s	27.07	10.65	82.36	73.1	1.70398	4.92231e-05	0.0030587
Cdk5rap3	8.88	7.68	44.69	33.08	1.70426	0.000340533	0.0134469
Rps26	153.47	73.86	347.78	519.6	1.71875	2.13876e-06	0.000272131
Rpl28	183.37	120.42	451.58	663.34	1.72397	5.57341e-08	1.35383e-05
AK218261	51.52	19.36	135.79	151.98	1.73728	1.299e-05	0.00109608
Tkt	31.9	18.7	130.34	77.27	1.73743	1.28947e-05	0.00109608
Ptov1	4.47	4.21	17.69	33.4	1.74094	0.00130482	0.0350987
Eif3k	42.34	20.83	118.85	131.38	1.75909	1.60361e-06	0.000217581
Rpl41	264.57	173.54	677.28	980.71	1.76123	2.21433e-08	7.12421e-06
Rnd3	17.71	16.73	99.29	52.07	1.76202	3.29798e-05	0.00213199
Pde1c	2.77	11.37	67.94	21.25	1.76725	0.00104891	0.0296961
Ypel3	25.76	14.59	58.64	120.98	1.76729	4.33732e-05	0.00271625
Draxin	1.59	2.37	2.91	66.34	1.76902	0.0021463	0.048464
Rps18	272.9	155.19	717.11	926.32	1.77215	4.63816e-08	1.16186e-05
H19	0.83	1.54	40.38	6.07	1.77819	0.00203101	0.0469182
Efemp2	5.38	3.72	24.97	29.39	1.77988	0.000708551	0.0221761
Mt3	22.33	13.71	81.47	69.52	1.78461	5.84818e-06	0.000633501
Rab26	6.29	7.09	90.81	10.65	1.79583	0.00129717	0.0350106
Rps19	340.22	215.6	996.73	1131.14	1.79969	1.06085e-09	4.72431e-07
Ntn1	13.35	11.32	54.21	54.08	1.80511	2.34322e-05	0.00170757
Tuba1c	2.57	4.82	22.13	31.23	1.81654	0.000686428	0.0215781
Gabra2	13.23	34.46	112.78	94.22	1.81726	9.13223e-06	0.000877479
Gapdh	463.7	378.15	2153.83	1204.16	1.81919	2.67228e-08	7.71596e-06
Matn2	6.83	3.74	41.76	24.46	1.82017	0.000447806	0.0162426
Eef2	190.46	107.89	441.4	796.59	1.82397	5.17465e-07	9.21778e-05
Anxa6	13.34	16.3	62.7	64.94	1.82619	6.53741e-06	0.000689525
Rpl31-ps12	157.43	66.47	437.05	496.23	1.829	5.80944e-07	0.000101236
Anxa1	3.69	2.53	77.36	5.57	1.83692	0.00134941	0.035438
Cd200	10.1	6.93	65.01	28.76	1.84858	0.000180464	0.00853385
Grina	36.02	31.54	109.2	179.55	1.86081	1.86661e-07	3.83661e-05
H2-T23	3.17	1.47	46.76	7.53	1.87374	0.00109465	0.0307885
Tceal3	2.06	1.88	31.93	12.05	1.87685	0.000944142	0.0274212
Gpi1	193.63	158.55	1237.81	408.14	1.88041	5.74452e-06	0.000633501
Aldoa	185.65	141.4	937.65	468.87	1.88407	9.40709e-08	2.09465e-05
Cox6b2	22.02	23.22	154.71	63.31	1.88888	1.13973e-05	0.00102653
Rnd2	5.33	4.56	17.53	53.85	1.89135	0.000423089	0.0155619
Cryab	10.44	24.83	141.94	49.51	1.89265	8.24906e-05	0.00465665
Masp1	7.85	7.89	59.16	31.18	1.89593	9.32614e-05	0.00513612
Igfbp5	83.99	131.6	1907.39	441.94	1.89636	0.00088225	0.026115
Nt5dc2	11.95	7.3	58.52	42.16	1.91629	3.04353e-05	0.00206273
Gnb2	12.18	7.26	38.77	63.69	1.91698	4.02397e-05	0.00253986
Wscd1	14.11	10.33	50.11	70.82	1.92676	8.47157e-06	0.000831624
Ftl1	266.96	266.54	1298.27	928.45	1.93592	1.4892e-12	9.94786e-10
Fau	108.75	59.97	398.56	342.96	1.94999	1.59678e-09	6.73673e-07
Trp53i11	4.4	1.26	29.67	19.32	1.95451	0.000445712	0.0162401
Rpl18	6.8	4.01	31.46	39.89	1.96085	9.90508e-05	0.00525822
Atox1	13.7	9.4	53.15	66.83	1.96937	5.0514e-06	0.000578457
Atp5d	13.74	11.43	68.54	60.32	1.99579	1.47931e-06	0.000208038
Rps9	118.91	76.15	349.96	550.28	2.00318	1.72903e-09	6.92995e-07
Commd4	33.94	27.81	196.89	107.83	2.02071	6.37349e-08	1.50264e-05
Gstt1	6.7	22.15	61.48	111.75	2.04387	9.75692e-06	0.000920135
Rap1gap	2.84	5.51	15.55	71.2	2.04439	0.000199942	0.00913202
Gmpr	2.53	2.45	35.01	18.28	2.06686	0.000180294	0.00853385
Olfr288	5.73	8.58	75.92	29.51	2.07814	3.23449e-05	0.00211679
Ptgds	38.69	22.16	101.24	239.75	2.08138	8.04868e-07	0.000129036
Sel1l3	1.53	3.1	47.43	14.4	2.08982	0.000187396	0.00873354
Sparc	119.53	192.81	664.18	850.36	2.09733	1.01214e-11	5.7952e-09
Vcan	6.63	8.51	93.65	28.04	2.11281	3.37221e-05	0.00216253
AK148054	4.12	4.1	59.69	17.91	2.11336	9.68929e-05	0.00521271
Ndrg1	1.41	3.35	79.23	6.75	2.12558	0.000213952	0.00963388
Igfbp7	0.33	0.46	52.69	3.68	2.13565	0.000200503	0.00913202
Sdpr	10.34	5.37	35.77	70.61	2.1406	1.13124e-05	0.00102653
Chrna4	3.5	4.16	28.44	42.58	2.20318	1.97607e-05	0.0014994
Atp6v0c	1.69	4.87	29.05	39.31	2.2289	2.17388e-05	0.0015987
Mif	9.76	9.15	93.93	44.92	2.27134	8.44362e-07	0.000129701
Uba52 (uc009mam.1)	98.71	64.49	367.58	550.42	2.27475	2.66777e-12	1.64499e-09
AK009067	2.43	2.54	28.57	30.17	2.29535	1.88311e-05	0.00149456
E030003E18Rik	13.24	33.96	215.92	115.98	2.35687	2.60535e-08	7.71596e-06
Selenbp1	4.72	1.94	52.85	26.79	2.36789	6.89472e-06	0.000708565
Spon1	30.9	30.61	207.99	171.83	2.4012	2.05483e-14	1.64715e-11
Fgf12	1.37	1.14	8.87	69.21	2.41739	2.45623e-05	0.0017424
Smoc1	61.42	38.87	237.19	492.81	2.50622	4.55068e-11	2.43188e-08
Rpl8	46.57	25.95	256.64	241.43	2.52162	1.30654e-14	1.30915e-11
Aldh1a1	29.51	77.39	555.04	317.85	2.59298	1.12737e-10	5.31588e-08
Mgarp	3.47	7.76	33.26	133.16	2.66694	3.69757e-07	6.89296e-05
Tmem132b	0.49	0.48	32.89	17.23	2.7191	2.06569e-06	0.000267074
Rps15	53.2	36.85	321.22	386.32	2.75158	6.50317e-20	2.60647e-16
Nell2	4.92	2.42	43.36	57.26	2.7687	2.6952e-08	7.71596e-06
Dtx3	29.26	17.73	163.45	254.46	2.78795	1.68103e-14	1.49724e-11
5930412G12Rik	4.3	8.19	52.66	97.52	2.81882	2.04368e-09	7.80102e-07
Bmp3	0.13	0.82	29.43	29.91	2.86244	3.0557e-07	5.83203e-05
Ifitm2	10.98	6.43	199.18	69.43	3.06161	1.00449e-10	5.0325e-08
1500015O10Rik	0.79	0.61	159.25	15.85	3.13297	2.84666e-08	7.86856e-06
Fam65a	6.51	4.48	86.5	86.62	3.21368	1.77871e-13	1.2962e-10
Tagln3	3.25	1.96	98.22	135.32	4.15923	1.92268e-19	5.13741e-16
Mir7-1	0	0	73.15	72.06	4.33123	1.36754e-16	1.56603e-13
Mir6516	0	0	125.66	61.9	4.44943	3.00058e-17	4.00878e-14
