# Supplementary material for: Chromatin-mediated translational control is essential for neural cell fate specification
Source: Life Sci Alliance. 2018 Aug 23;1(4):e201700016. doi: 10.26508/lsa.201700016 (PMC6238594; doi:10.26508/lsa.201700016)
Supplement: Supplementary file 2 [file LSA-2017-00016_TableS2.xlsx]

## Sheet: GO analysis.txt
Supplementary Table 2. List of significantly enriched gene ontology (GO) terms
GO biological process complete	GO category	Observed	Expected	Fold Enrichment	P-value
	(# of genes)	(# of genes)	(# of genes)
ribosomal small subunit assembly (GO:0000028)	12	6	0.17	> 5	0.000221
ribosome assembly (GO:0042255)	30	7	0.43	> 5	0.0026
ribosomal small subunit biogenesis (GO:0042274)	42	9	0.6	> 5	0.000112
translation (GO:0006412)	271	43	3.89	> 5	5.2e-27
peptide biosynthetic process (GO:0043043)	291	43	4.17	> 5	8.7e-26
peptide metabolic process (GO:0006518)	369	47	5.29	> 5	9.65e-26
amide biosynthetic process (GO:0043604)	347	43	4.97	> 5	8.46e-23
cellular amide metabolic process (GO:0043603)	481	47	6.9	> 5	6.35e-21
organonitrogen compound biosynthetic process (GO:1901566)	702	54	10.06	> 5	9.54e-20
ribosome biogenesis (GO:0042254)	196	15	2.81	> 5	0.00178
generation of precursor metabolites and energy (GO:0006091)	207	15	2.97	> 5	0.00351
ribose phosphate metabolic process (GO:0019693)	255	15	3.66	4.1	0.0435
organonitrogen compound metabolic process (GO:1901564)	1259	74	18.05	4.1	1.73e-21
oxidation-reduction process (GO:0055114)	865	34	12.4	2.74	0.00112
cellular protein metabolic process (GO:0044267)	2718	84	38.97	2.16	4.59e-08
protein metabolic process (GO:0019538)	3362	95	48.2	1.97	1.82e-07
regulation of cellular component organization (GO:0051128)	2095	56	30.04	1.86	0.0331
organic substance biosynthetic process (GO:1901576)	3371	85	48.33	1.76	0.00065
regulation of cell communication (GO:0010646)	2620	66	37.56	1.76	0.0288
cellular biosynthetic process (GO:0044249)	3270	82	46.88	1.75	0.00152
biosynthetic process (GO:0009058)	3446	85	49.41	1.72	0.0017
single-organism metabolic process (GO:0044710)	3453	83	49.51	1.68	0.0073
establishment of localization (GO:0051234)	3295	79	47.24	1.67	0.0163
transport (GO:0006810)	3170	76	45.45	1.67	0.0272
localization (GO:0051179)	4100	96	58.78	1.63	0.00235
nitrogen compound metabolic process (GO:0006807)	4189	95	60.06	1.58	0.0119
cellular metabolic process (GO:0044237)	6833	153	97.96	1.56	6.8e-07
metabolic process (GO:0008152)	7858	172	112.66	1.53	7.11e-08
organic substance metabolic process (GO:0071704)	7367	157	105.62	1.49	1.55e-05
primary metabolic process (GO:0044238)	7079	148	101.49	1.46	0.000301
cellular process (GO:0009987)	13249	239	189.95	1.26	4.81e-05
Unclassified (UNCLASSIFIED)	1652	15	23.68	0.63	0
sensory perception of chemical stimulus (GO:0007606)	1230	2	17.63	< 0.2	0.019
detection of chemical stimulus involved in sensory perception of smell (GO:0050911)	1083	1	15.53	< 0.2	0.0157
detection of chemical stimulus involved in sensory perception (GO:0050907)	1128	1	16.17	< 0.2	0.0083
detection of chemical stimulus (GO:0009593)	1154	1	16.54	< 0.2	0.00573
detection of stimulus involved in sensory perception (GO:0050906)	1186	1	17	< 0.2	0.00363
detection of stimulus (GO:0051606)	1279	1	18.34	< 0.2	0.000955

## Sheet: Enrichment>5.0
GO biological process complete	GO category (# of genes)	Observed ( # of genes)	Expected (# of genes)	Fold Enrichment	P-value
organonitrogen compound biosynthetic process (GO:1901566)	702	54	10.06	> 5	9.54e-20
cellular amide metabolic process (GO:0043603)	481	47	6.9	> 5	6.35e-21
amide biosynthetic process (GO:0043604)	347	43	4.97	> 5	8.46e-23
peptide metabolic process (GO:0006518)	369	47	5.29	> 5	9.65e-26
peptide biosynthetic process (GO:0043043)	291	43	4.17	> 5	8.7e-26
translation (GO:0006412)	271	43	3.89	> 5	5.2e-27
generation of precursor metabolites and energy (GO:0006091)	207	15	2.97	> 5	0.00351
ribosome biogenesis (GO:0042254)	196	15	2.81	> 5	0.00178
ribosomal small subunit biogenesis (GO:0042274)	42	9	0.6	> 5	0.000112
ribosome assembly (GO:0042255)	30	7	0.43	> 5	0.0026
ribosomal small subunit assembly (GO:0000028)	12	6	0.17	> 5	0.000221
