# Supplementary material for: Chromatin-mediated translational control is essential for neural cell fate specification
Source: Life Sci Alliance. 2018 Aug 23;1(4):e201700016. doi: 10.26508/lsa.201700016 (PMC6238594; doi:10.26508/lsa.201700016)
Supplement: Supplementary file 3 [file LSA-2017-00016_TableS3.xlsx]

## Sheet: Sheet1
Supplementary Table 3. Expression of Ribosomal protein (RP) genes
Gene name	WT_rep1	WT_rep2	Chd5-/-_rep1	Chd5-/-_rep2	log2FoldChange	p-value	adjusted	HGNC
	(TPM)	(TPM)	(TPM)	(TPM)	[Chd5-/-]/[WT]		p-value	Symbol
Rplp0	227.1	142.18	441.14	652.91	1.43166	1.02e-05	0.000955065	RPLP0
Rplp1	205.44	153.73	360	432.65	1.07401	9.42e-05	0.00513612	RPLP1
Rplp2	139.18	96.14	326.74	382.97	1.48801	2.45e-07	4.9e-05	RPLP2
Rpl6	462.45	281.75	734.22	797.24	0.964473	0.00135329	0.035438	RPL6
Rpl7a	305.91	168.27	685.03	989.36	1.64391	1.41e-06	0.000201184	RPL7A
Rpl8	46.57	25.95	256.64	241.43	2.52162	1.31e-14	1.31e-11	RPL8
Rpl10a	348.88	181.34	605.81	743.95	1.22174	0.000285012	0.0119567	RPL10A
Rpl11	687.82	442.09	1038.03	1180.8	0.905771	0.00202423	0.0469182	RPL11
Rpl13	388.28	207.27	792.37	726.5	1.23236	0.000159554	0.00784655	N/A
Rpl13a	422.45	288.05	738.74	738.47	0.991289	0.000361134	0.013851	RPL13A
Rpl18	6.8	4.01	31.46	39.89	1.96085	9.91e-05	0.00525822	N/A
Rpl18a	122.07	69.58	273.86	346.77	1.54563	1.97e-06	0.000259285	RPL18A
Rpl19	448.68	289.3	864.62	959.79	1.21647	3.01e-05	0.00206093	RPL19
Rpl24	639.8	470.7	994.02	1028.42	0.816091	0.00196486	0.0459556	RPL24
Rpl26	777.82	466.01	1562.07	1779.32	1.31556	1.85e-05	0.00148582	RPL26
Rpl28	183.37	120.42	451.58	663.34	1.72397	5.57e-08	1.35e-05	RPL28
Rpl29	167.65	103.1	259.66	368.44	1.10671	0.000663927	0.0211324	RPL29
Rpl31-ps12	157.43	66.47	437.05	496.23	1.829	5.81e-07	0.000101236	N/A
Rpl32	733.72	427.89	1368.87	1662.52	1.27025	5.87e-05	0.00351967	RPL32
Rpl34	425.12	255	625.84	872.04	1.04137	0.00127441	0.0345125	RPL34
Rpl35	204.77	146.35	431.44	537.72	1.36876	1.63e-06	0.000217581	RPL35
Rpl35a	1056.34	699.66	1707.7	1652.02	0.875386	0.002057	0.0471112	RPL35A
Rpl36	7.8	2.46	23.51	33.59	1.6887	0.00166318	0.0405028	RPL36
Rpl37	111.93	58.26	241.03	295.8	1.49843	1.09e-05	0.00100479	RPL37
Rpl37a	224.69	147.81	530.61	708.41	1.60146	1.38e-07	2.91e-05	RPL37A
Uba52	98.71	64.49	367.58	550.42	2.27475	2.66777e-12	1.64499e-09	UBA52
Rpl41	264.57	173.54	677.28	980.71	1.76123	2.21e-08	7.12e-06	RPL41
Rpsa	267.36	170.67	467.97	576.96	1.16266	0.000107387	0.0055897	N/A
Rps2	440.32	333.58	715.06	854.41	0.960782	0.000344518	0.0134715	RPS2
Rps3	303.44	219.43	490.73	553.14	0.94062	0.000554342	0.0185264	RPS3
Rps5	195.59	110.47	467.17	621.07	1.66639	3.96e-07	7.21e-05	RPS5
Rps8	455.16	275.02	882.32	1011.76	1.27101	3.14e-05	0.00207837	RPS8
Rps9	118.91	76.15	349.96	550.28	2.00318	1.73e-09	6.93e-07	RPS9
Rps10	290.87	167.81	666.46	805.28	1.54228	1.08e-06	0.000160153	RPS10
Rps11	938.71	554.14	1409.78	1695.84	0.971774	0.00194335	0.0458114	RPS11
Rps12	685.85	444.9	1108.33	1409.25	1.06935	0.000375974	0.0141677	RPS12
Rps14	307.82	166.21	743.74	866.29	1.60873	8.32e-07	0.000129701	RPS14
Rps15	53.2	36.85	321.22	386.32	2.75158	6.5e-20	2.61e-16	RPS15
Rps16	409.92	243.73	709.52	866.63	1.1686	0.000181295	0.00853385	RPS16
Rps17	947.62	630.86	1626.12	1709.88	1.00933	0.000370498	0.014092	RPS17
Rps18	272.9	155.19	717.11	926.32	1.77215	4.64e-08	1.16e-05	RPS18
Rps19	340.22	215.6	996.73	1131.14	1.79969	1.06e-09	4.72e-07	RPS19
Rps26	153.47	73.86	347.78	519.6	1.71875	2.14e-06	0.000272131	RPS26
Rps28	465.3	300.33	856.96	1210.56	1.31897	2.63e-05	0.00185274	RPS28
Rps29	317.33	225.94	514.52	609.86	0.985534	0.000399676	0.0148324	RPS29
Fau	108.75	59.97	398.56	342.96	1.94999	1.59678e-09	6.73673e-07	FAU
Rpl3	729.55	451.35	1027.36	1306.66	0.906015	0.00340333	0.0652658	RPL3
Rpl4	965.13	614.38	1332.54	1566.13	0.813571	0.00627538	0.098828	RPL4
Rpl5	1110	817.63	1286.73	1367.69	0.435966	0.0987428	0.472477	RPL5
Rpl7	2003.37	1437.17	2708.81	2784.19	0.636923	0.0168749	0.18429	RPL7
Rpl7l1	51.46	42.37	70	50.47	0.326218	0.371183	0.797557	RPL7L1
Rpl9	1411.93	1006.52	2054.67	2102.38	0.735916	0.00626634	0.098828	RPL9
Rpl10	1223.23	827.62	1485.19	1824.08	0.643183	0.0266228	0.243809	RPL10
Rpl12	566.67	350.47	814.23	827.99	0.780077	0.00877957	0.122822	RPL12
Rpl14	360.13	292.11	470.06	516.48	0.566536	0.0249203	0.236494	RPL14
Rpl15	371.53	284.82	543.94	509.23	0.644128	0.0130313	0.158032	RPL15
Rpl17	1242.85	800.62	1683.96	1870.96	0.743359	0.0109569	0.140755	RPL17
Rpl21	425.72	320.18	612.89	657.96	0.726639	0.00558651	0.0921429	RPL21
Rpl22	239.31	160.67	313.65	381.2	0.741809	0.0112556	0.14393	RPL22
Rpl22l1	777.87	826.11	761.1	775.58	-0.0590048	0.797391	0.957107	N/A
Rpl23	1122.44	844.54	1276.05	1498.55	0.468238	0.0795707	0.427105	RPL23
Rpl23a	2225.03	1617.12	2391.46	2652.62	0.370345	0.165725	0.585738	RPL23A
Rpl27	251.4	155.13	377.2	350.74	0.780873	0.00925256	0.127748	RPL27
Rpl27a	752.75	498.87	1012.04	1066.62	0.684091	0.0160885	0.180372	RPL27A
Rpl30	2087.13	1678.19	2289.59	2215	0.246494	0.316441	0.761928	RPL30
Rpl31	389.64	290.83	527.97	709.59	0.805424	0.00487247	0.0839951	RPL31
Rpl36a	971.49	716.18	1479.58	1383.37	0.720637	0.00637576	0.0998204	RPL36A
Rpl36al	252.17	181.1	465.49	323.09	0.799432	0.00827747	0.118064	RPL36AL
Rpl38	821.87	572.79	1208.01	1286.45	0.78759	0.00412596	0.0748273	RPL38
Rpl39	3281.09	3043.24	3071.12	3551.11	0.0636745	0.781785	0.953123	RPL39
Rps3a1	1902.21	1246.96	2531.01	2598.69	0.657903	0.0211367	0.212587	N/A
Rps4x	2711.82	1861.2	3070.36	3824.52	0.553711	0.05193	0.352287	RPS4X
Rps6	644.56	386.4	921.16	986.09	0.820183	0.00711443	0.106796	RPS6
Rps7	648.28	460.1	792.51	881.26	0.559693	0.0407373	0.306045	RPS7
Rps13	1049.45	754.29	1076.72	1224.19	0.330972	0.224435	0.670544	RPS13
Rps15a	84.21	55.92	124.8	129.19	0.788591	0.012808	0.155795	RPS15A
Rps20	1238.37	950.26	1555.58	1786.44	0.57778	0.0272917	0.24664	RPS20
Rps21	520.74	441.22	761.47	940.97	0.779622	0.00250466	0.0536827	RPS21
Rps23	1326.05	925.54	1807.41	1883.02	0.669642	0.014481	0.169956	RPS23
Rps24	2050.77	1577.06	3441.27	2454.86	0.654552	0.0219056	0.217327	RPS24
Rps25	1338.68	875.62	1627.08	1692.12	0.544565	0.0582157	0.370686	RPS25
Rps27	1853.33	1140.65	2685.34	3273.81	0.917424	0.00268852	0.0561971	RPS27
Rps27a	1671.78	1208.85	2247.66	1753.63	0.443507	0.11768	0.507999	RPS27A
Rps27l	957.68	908.27	1210.16	553.16	-0.0731432	0.837453	0.962271	RPS27L
